# Supplementary material
Source: PubMed Central journal article supplement (PMC5862073)
Supplement: NIHMS950173-supplement-supplemental_tables_1_-_3.pdf [file NIHMS950173-supplement-supplemental_tables_1_-_3.pdf]

| Description            | DCC Biosample | Barcodes                                          | Raw reads for both replicates (M) | Uniquely mapped reads | Reads with valid barcodes | Estimated PCR duplication rate | Mitochondrial reads | Final read count (M) | Reads for each replicate (M) |
|------------------------|---------------|---------------------------------------------------|-----------------------------------|-----------------------|---------------------------|--------------------------------|---------------------|----------------------|------------------------------|
| E115_Rep1              | ENCBS745VOM   | Set_1; p5 only 7 bp called                        | 683                               | 82%                   | 46%                       | 49%                            | 4%                  | 116                  | 54                           |
| E115_Rep2              | ENCBS720JOH   | Set_2; p5 only 7 bp called                        |                                   |                       |                           |                                |                     |                      | 62                           |
| E125_Rep1              | ENCBS974GPH   | Set_1                                             | 491                               | 85%                   | 71%                       | 56%                            | 5%                  | 113                  | 68                           |
| E125_Rep2              | ENCBS617DPG   | Set_2                                             |                                   |                       |                           |                                |                     |                      | 46                           |
| E135_Rep1              | ENCBS273RVL   | Set_1                                             |                                   |                       |                           |                                |                     |                      | 57                           |
| E135_Rep2              | ENCBS793ZRY   | Set_2 for p5, p7 and i7; i5: S502-S511; X528-X535 | 486                               | 84%                   | 46%                       | 36%                            | 2%                  | 109                  | 52                           |
| E145_Rep1              | ENCBS002AAA   | Set_1                                             | 436                               | 87%                   | 58%                       | 39%                            | 4%                  | 118                  | 61                           |
| E145_Rep2              | ENCBS014AAA   | Set_2                                             |                                   |                       |                           |                                |                     |                      | 57                           |
| E155_Rep1              | ENCBS811RMD   | Set_1                                             | 476                               | 84%                   | 93%                       | 53%                            | 2%                  | 160                  | 72                           |
| E155_Rep2              | ENCBS841GER   | Set_2                                             |                                   |                       |                           |                                |                     |                      | 88                           |
| E165_Rep1              | ENCBS156DHU   | Set_1                                             | 545                               | 88%                   | 34%                       | 39%                            | 4%                  | 86                   | 43                           |
| E165_Rep2              | ENCBS512LKA   | Set_2                                             |                                   |                       |                           |                                |                     |                      | 43                           |
| P0_Rep1                | ENCBS038AAA   | Set_1                                             | 361                               | 85%                   | 83%                       | 52%                            | 2%                  | 108                  | 51                           |
| P0_Rep2                | ENCBS554AAA   | Set_2                                             |                                   |                       |                           |                                |                     |                      | 57                           |
| P56_Rep1               |               | Set_1                                             | 680                               | 89%                   | 65%                       | 73%                            | 4%                  | 90                   | 47                           |
| P56_Rep2               |               | Set_2                                             |                                   |                       |                           |                                |                     |                      | 44                           |
| hu_GM12878_mu_E155_mix |               | p5:1-8, p7:1-12 i5: S502-S511; i7: S701-S715      | 27                                | 87%                   | 89%                       | 38%                            | 2%                  | 13                   |                              |

Barcode sets (for sequences see Supplementary Table 1)

| Set 2 |           |
|-------|-----------|
| p5    | 1-8       |
| p7    | 1-12      |
| i5    | X520-X535 |
| i7    | N731-X754 |

| Set 1 |                      |
|-------|----------------------|
| p5    | 1-8                  |
| p7    | 1-12                 |
| i5    | S502-S511, X512-X519 |
| i7    | N701-N729, N730      |

**Supplementary Table 1: Sequencing statistics for single nuclei ATAC-seq libraries.** General overview of sequencing for single nuclei ATAC-seq libraries including PCR duplication rates and fraction of mitochondrial reads. Please note that paired end reads were treated as separate reads. Sequencing libraries for replicate 1 and 2 were sequenced together and single cell datasets were assigned based on replicate specific barcode combinations (Set\_1 or Set\_2). One exception was E13.5 where replicate 1 and 2 were sequenced on separate lanes. Please note that for E11.5 7 out of 8 bp were detected for the p5 barcode. M: million.

| Sample     | Cells pass QC (#) | Reads per cell (median) | Promoter coverage (median) | Fraction of reads in peaks (median) |
|------------|-------------------|-------------------------|----------------------------|-------------------------------------|
| E11.5_Rep1 | 528               | 16,023                  | 10.6%                      | 17.5%                               |
| E11.5_Rep2 | 685               | 16,499                  | 11.1%                      | 17.5%                               |
| E12.5_Rep1 | 781               | 18,397                  | 11.2%                      | 15.7%                               |
| E12.5_Rep2 | 303               | 17,945                  | 10.3%                      | 14.9%                               |
| E13.5_Rep1 | 651               | 16,891                  | 11.8%                      | 18.4%                               |
| E13.5_Rep2 | 646               | 14,669                  | 11.1%                      | 18.7%                               |
| E14.5_Rep1 | 976               | 14,440                  | 11.3%                      | 19.8%                               |
| E14.5_Rep2 | 905               | 14,489                  | 11.5%                      | 19.2%                               |
| E15.5_Rep1 | 1,591             | 16,789                  | 12.2%                      | 20.4%                               |
| E15.5_Rep2 | 2,235             | 17,840                  | 12.9%                      | 20.5%                               |
| E16.5_Rep1 | 317               | 12,758                  | 11.0%                      | 23.2%                               |
| E16.5_Rep2 | 738               | 10,460                  | 11.4%                      | 29.3%                               |
| P0_Rep1    | 1,044             | 9,275                   | 13.3%                      | 36.0%                               |
| P0_Rep2    | 1,333             | 8,703                   | 12.6%                      | 37.4%                               |
| P56_Rep1   | 1,569             | 12,509                  | 11.6%                      | 27.1%                               |
| P56_Rep2   | 1,465             | 12,689                  | 11.5%                      | 26.4%                               |
| Average    | 985               | 14,399                  | 11.6%                      | 22.6%                               |
| Total      | 15,767            |                         |                            |                                     |

**Supplementary Table 2: Overview of single nuclei ATAC-seq data after filtering out low quality cells.** Overview of nuclei that pass quality control and general properties of data sets including promoter coverage and fraction of reads in peaks.

| Parameter                           | this study             | Cusanovich et al. 2015 <sup>12</sup> | Buenrostro et al. 2015 <sup>13</sup> |
|-------------------------------------|------------------------|--------------------------------------|--------------------------------------|
| Single cell strategy                | Combinatorial indexing | Combinatorial indexing               | Microfluidics                        |
| Sample type                         | Frozen tissues         | Cell lines                           | Cell lines                           |
| Total cells/nuclei (per experiment) | 15,676 (303-2,235)     | 15,814 (533-1,459)                   | 1886 (n.r.)                          |
| Reads per cell/nucleus (median)     | 9,375-18,397           | 1,390-3,094                          | 73,000 (average)                     |
| Fraction of reads in peaks          | 15.7%-37.4%            | 41-59 %                              | > 15%                                |
| Promoter coverage per cell/nucleus  | 11.60%                 | n.r.                                 | 9.40%                                |

**Supplementary Table 3: Comparison of single nuclei ATAC-seq with previously published initial single cell ATAC-seq studies.** Table illustrating several characteristics of single nuclei/cell ATAC-seq libraries. n.r. not reported
